# Supplementary material
Source: PubMed Central journal article supplement (PMC6738801)
Supplement: jin-0008-0464-s01.pdf [file jin-0008-0464-s01.pdf]

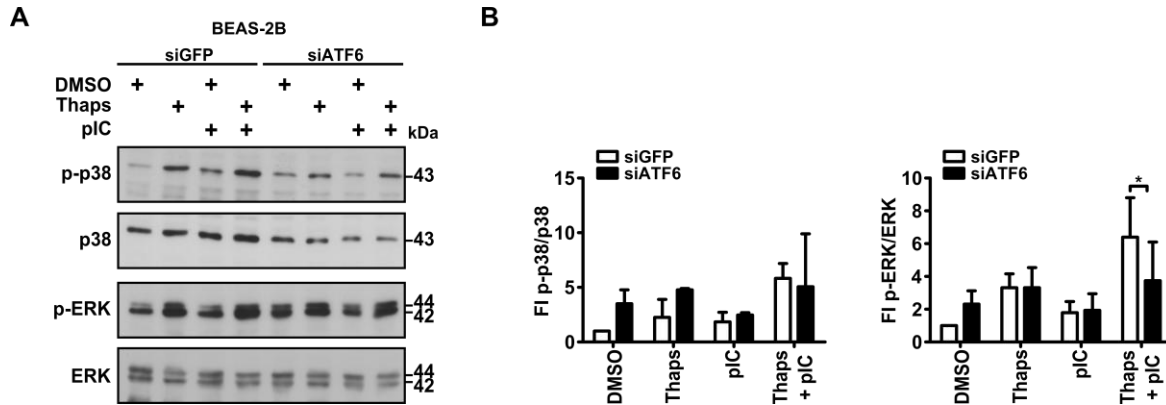

**Supplemental Fig. 1** ATF6 modulates ERK activation. BEAS-2B cells were transfected with siRNA against ATF6. After 42 h, cells were pretreated with DMSO or thapsigargin (Thaps) for 1 h and subsequently stimulated with pIC for 5 min. Protein levels of activated, phosphorylated p38 (p-p38), ERK (p-ERK) and the respective unphosphorylated proteins were analyzed by Western blotting (representative of n=3). Quantification of (A) is represented as a ratio of phosphorylated p38 or phosphorylated ERK and their respective unphosphorylated forms and depicted in (B). Data are shown as mean+SD.
